# Supplementary material for: GM3 Ganglioside Linked to Neurofibrillary Pathology in a Transgenic Rat Model for Tauopathy
Source: MDPI journal article supplement (doi:10.3390/ijms222212581), 2021-11-22
Supplement: s1 [file s1]

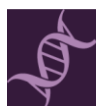

Article

# GM3 Ganglioside Linked to Neurofibrillary Pathology in a Transgenic Rat Model for Tauopathy

Dominika Olešová <sup>1,2</sup>, Petra Majerová <sup>1</sup>, Roman Hájek <sup>3</sup>, Juraj Piešťanský <sup>4</sup>, Radana Brumarová <sup>5</sup>, Alena Michalicová <sup>1</sup>, Bernadeta Jurkanin <sup>1</sup>, David Friedecký <sup>5</sup> and Andrej Kováč <sup>1,\*</sup>

<sup>1</sup> Institute of Neuroimmunology, Slovak Academy of Sciences, Dúbravská cesta 9, 84510 Bratislava, Slovak Republic; dominika.olesova@savba.sk (D.O.); petra.majerova@savba.sk (P.M.); alena.michalicova@savba.sk (A.M.); [bernadeta.valachova@savba.sk](mailto:bernadeta.valachova@savba.sk) (B.J.)

<sup>2</sup> Laboratory of Biomedical Microbiology and Immunology, University of Veterinary Medicine and Pharmacy, 04181 Kosice, Slovak Republic

<sup>3</sup> Waters Corporation, Stamford Avenue, Altrincham Road, Wilmslow SK9 4AX, United Kingdom; [roman\\_hajek@waters.com](mailto:roman_hajek@waters.com) (R.H.)

<sup>4</sup> Department of Pharmaceutical Analysis and Nuclear Pharmacy, Faculty of Pharmacy, Comenius University in Bratislava, Odbojarov 10, 83232 Bratislava, Slovak Republic; [piestansky@fpharm.uniba.sk](mailto:piestansky@fpharm.uniba.sk) (J.P.)

<sup>5</sup> Laboratory for Inherited Metabolic Disorders, Department of Clinical Biochemistry, University Hospital Olomouc, and Faculty of Medicine and Dentistry, Palacký University Olomouc, I. P. Pavlova 6, 77900 Olomouc, Czech Republic; [radana.karlikova@gmail.com](mailto:radana.karlikova@gmail.com) (R.B.), [david.friedecky@upol.cz](mailto:david.friedecky@upol.cz) (D.F.)

\* Correspondence: [andrej.kovac@savba.sk](mailto:andrej.kovac@savba.sk); Tel.: +421-2-54788100

## (Supplementary Material)

### Table of contents

**Table S1.** List of glycosphingolipids identified in pooled rat brain tissue using HILIC/ESI-MS/MS method.

**Table S2.** Statistical analysis of data from GSL screening in aging rats and transgenic rat model for tau pathology.

**Table S3.** Results from reproducibility testing.

**Figure S1.** Principal component analysis (A) and Orthogonal-least square – discriminant analysis (B) of GSL screening data.

**Figure S2.** Comparison of relative peak areas for different extraction volumes, shown for major individual gangliosides GD1a d36:1, GD1b d36:1, GM1a d36:1, GM3 d36:1, and ST d36:1.

**Figure S3.** Immunostaining pattern of astrocytes and tau pathology in SHR-24 tau transgenic and control animals (SHR).

**Figure S4.** CD3+ T-cell and CD4+ T-cell occurrence in SHR-24 transgenic rat model for tauopathies compared to control animal (SHR).

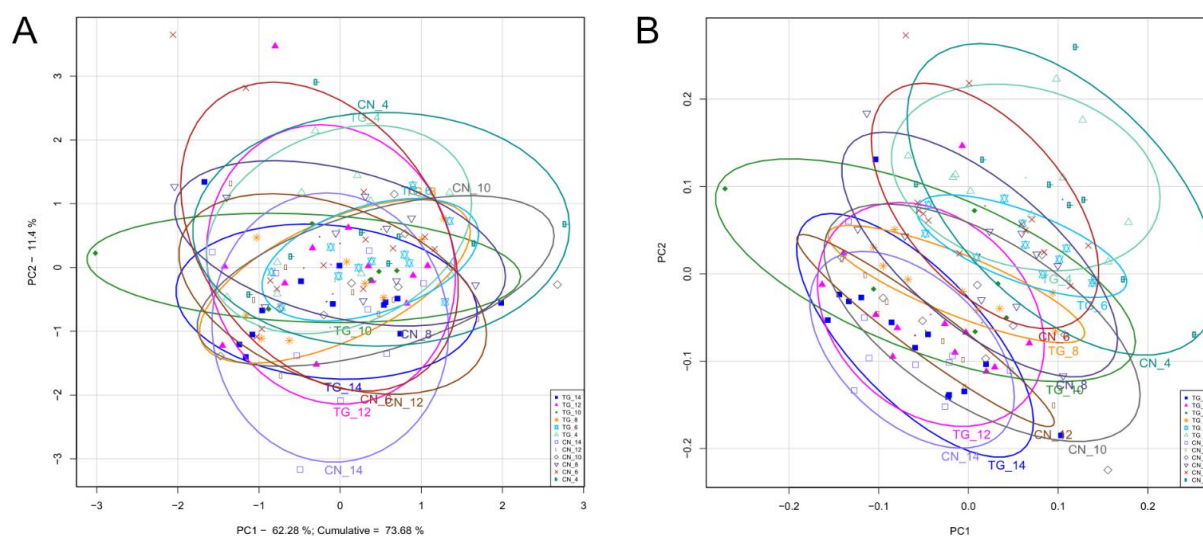

**Figure S1.** Principal component analysis (A) and Orthogonal-least square – discriminant analysis (B) of GSL screening data.

### Optimization of the sample preparation protocol

The original extraction procedure [1] was modified in order to improve the sample throughput and to minimize the consumption of the organic solvents. Different amounts of extraction solvent were tested and compared with the original method to verify if the yields of the adjusted method are satisfactory. Results from extraction method comparison are shown in Figure S2. The obtained results showed acceptable extraction efficiency of the modified protocol. Moreover, the reproducibility of the modified extraction protocol was investigated. It was tested on 4 separately prepared samples, each with 3 injections. Results from reproducibility testing were satisfactory ( $RSD \leq 18\%$ ) and are shown in Table S3.

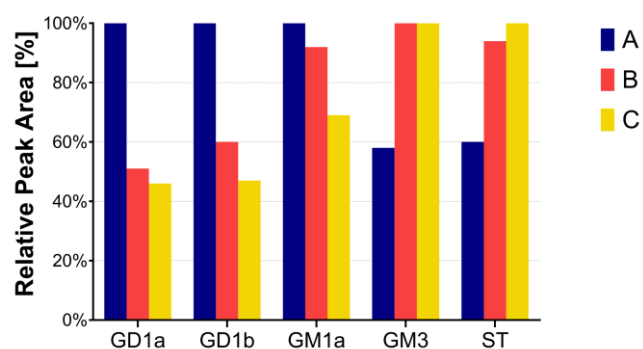

**Figure S2.** Comparison of relative peak areas for different extraction volumes, shown for major individual gangliosides GD1a d36:1, GD1b d36:1, GM1a d36:1, GM3 d36:1, and ST d36:1. Method A - 6 ml of extraction solution, Method B - 3 ml of extraction solution, and Method C - 1.5 ml of extraction solution.

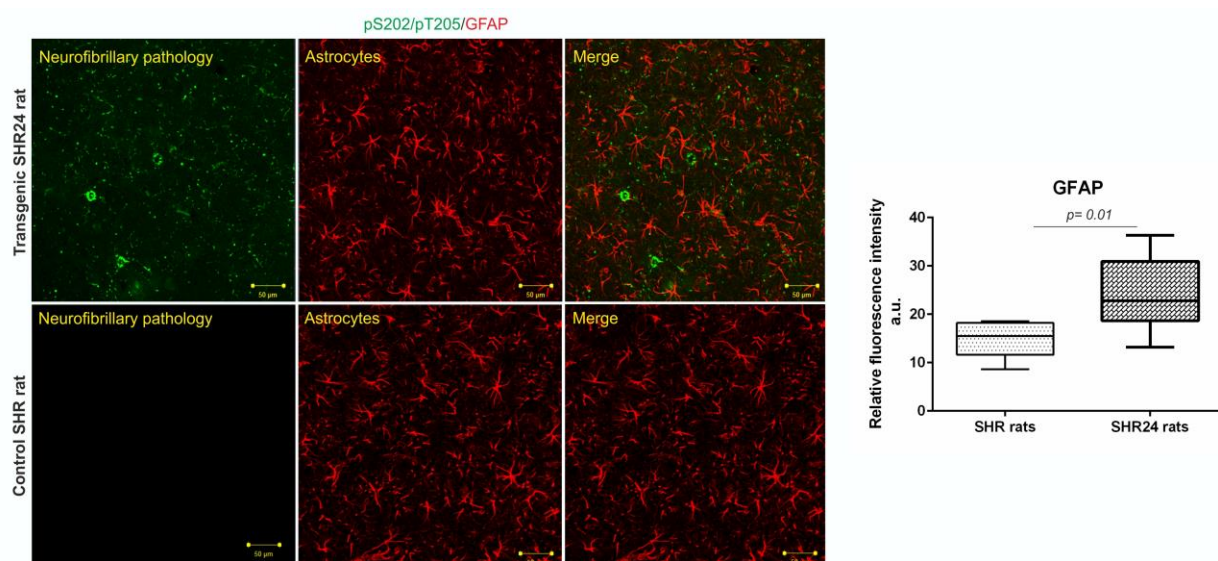

**Figure S3.** Immunostaining pattern of astrocytes and tau pathology in SHR-24 tau transgenic and control animals (SHR). Confocal microscopy showed that astrocytes stained with GFAP (red color) were distributed throughout the brain areas affected by neurofibrillary lesions immunolabelled with pSer202/pThr205 (AT8, green color).

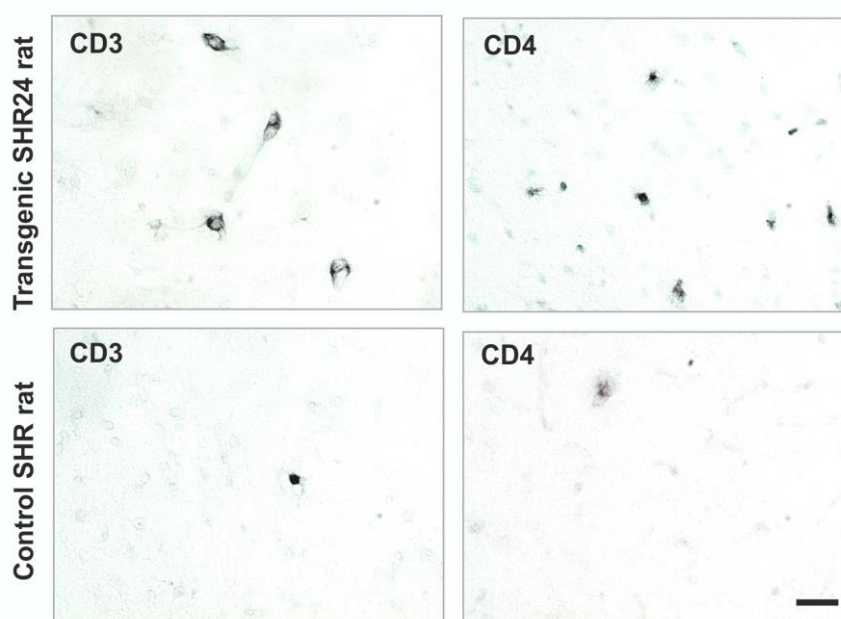

**Figure S4.** CD3+ T-cell and CD4+ T-cell occurrence in SHR-24 transgenic rat model for tauopathies compared to control animals (SHR). Scale bar 20  $\mu$ m,  $n = 3$ .

**Table S1.** List of glycosphingolipids identified in pooled rat brain tissue using HILIC/ESI-MS/MS method.

| Class   | Monoisotopic mass | Lipid species level | Elemental composition | Adduct | Theoretical m/z | Experimental m/z | Mass error [ppm] | RT [min.] | RIC peak height |
|---------|-------------------|---------------------|-----------------------|--------|-----------------|------------------|------------------|-----------|-----------------|
| GD0a    | 2038.0212         | GD0a d36:2          | C92H159N5O44          | [M-2H] | 1018.0106       | 1018.0069        | -3.63            | 7.50      | 4.84E+04        |
| GD0a    | 2040.0370         | GD0a d36:1          | C92H161N5O44          | [M-2H] | 1019.0185       | 1019.0154        | -3.04            | 7.45      | 8.66E+03        |
| GD0a    | 2066.0526         | GD0a d38:2          | C94H163N5O44          | [M-2H] | 1032.0263       | 1032.0160        | -9.98            | 7.38      | 3.90E+03        |
| GD0a    | 2068.0827         | GD0a d38:1          | C94H165N5O44          | [M-2H] | 1033.0341       | 1033.0284        | -5.52            | 7.40      | 1.84E+04        |
| GD1a    | 1834.9564         | GD1a d36:2          | C84H146N4O39          | [M-2H] | 916.4709        | 916.4633         | -8.29            | 6.46      | 6.60E+04        |
| GD1a    | 1836.9721         | GD1a d36:1          | C84H148N4O39          | [M-2H] | 917.4788        | 917.4767         | -2.29            | 6.43      | 1.02E+06        |
| GD1a    | 1850.9877         | GD1a d37:1          | C85H150N4O39          | [M-2H] | 924.4866        | 924.4915         | 5.30             | 6.36      | 2.05E+04        |
| GD1a    | 1862.9877         | GD1a d38:2          | C86H150N4O39          | [M-2H] | 930.4866        | 930.4889         | 2.47             | 6.33      | 3.77E+04        |
| GD1a    | 1865.0034         | GD1a d40:1          | C86H152N4O39          | [M-2H] | 931.4944        | 931.4911         | -3.54            | 6.33      | 3.94E+05        |
| GD1a    | 1893.0347         | GD1a d40:1          | C88H156N4O39          | [M-2H] | 945.5101        | 945.5026         | -7.93            | 6.26      | 2.20E+04        |
| GD1a-Ac | 1876.9670         | GD1a-Ac d36:2       | C86H148N4O40          | [M-2H] | 937.4762        | 937.4800         | 4.05             | 4.8       | 1.37E+04        |
| GD1a-Ac | 1878.9826         | GD1a-Ac d36:1       | C86H150N4O40          | [M-2H] | 938.4840        | 938.4766         | -7.89            | 4.9       | 1.59E+05        |
| GD1a-Ac | 1907.0139         | GD1a-Ac d38:1       | C88H154N4O40          | [M-2H] | 952.4997        | 952.4944         | -5.56            | 4.8       | 1.60E+05        |
| GD1b    | 1834.9564         | GD1b d36:2          | C84H146N4O39          | [M-2H] | 916.4709        | 916.4745         | 3.93             | 9.08      | 2.58E+04        |
| GD1b    | 1836.9721         | GD1b d36:1          | C84H148N4O39          | [M-2H] | 917.4788        | 917.4771         | -1.85            | 9.05      | 3.95E+05        |
| GD1b    | 1862.9877         | GD1b d38:2          | C86H150N4O39          | [M-2H] | 930.4866        | 930.4919         | 5.70             | 8.98      | 2.25E+04        |
| GD1b    | 1865.0034         | GD1b d38:1          | C86H152N4O39          | [M-2H] | 931.4944        | 931.4916         | -3.01            | 8.93      | 2.21E+05        |
| GD1b    | 1893.0347         | GD1b d40:1          | C88H156N4O39          | [M-2H] | 945.5101        | 945.5074         | -2.86            | 8.86      | 1.50E+04        |
| GD1b-Ac | 1876.9670         | GD1b-Ac d36:2       | C86H148N4O40          | [M-2H] | 937.4762        | 937.4720         | -4.48            | 6.79      | 2.14E+04        |
| GD1b-Ac | 1878.9826         | GD1b-Ac d36:1       | C86H150N4O40          | [M-2H] | 938.4840        | 938.4808         | -3.41            | 6.80      | 3.20E+05        |
| GD1b-Ac | 1907.0139         | GD1b-Ac d38:1       | C88H154N4O40          | [M-2H] | 952.4997        | 952.4960         | -3.88            | 6.68      | 2.16E+05        |
| GD2     | 1674.9192         | GD2 d36:1           | C78H138N4O34          | [M-2H] | 836.4524        | 836.4514         | -1.20            | 7.77      | 3.62E+04        |
| GD2     | 1702.9505         | GD2 d38:1           | C80H142N4O34          | [M-2H] | 850.4680        | 850.4666         | -1.65            | 7.70      | 7.79E+03        |
| GD3     | 1443.8086         | GD3 d34:1           | C68H121N3O29          | [M-2H] | 720.8970        | 720.8930         | -5.55            | 5.32      | 3.32E+03        |
| GD3     | 1469.8242         | GD3 d36:2           | C70H123N3O29          | [M-2H] | 733.9048        | 733.8992         | -7.63            | 5.26      | 5.23E+03        |
| GD3     | 1471.8399         | GD3 d36:1           | C70H125N3O29          | [M-2H] | 734.9127        | 734.9106         | -2.86            | 5.26      | 1.13E+05        |
| GD3     | 1497.8555         | GD3 d38:2           | C72H127N3O29          | [M-2H] | 747.9205        | 747.9182         | -3.08            | 5.17      | 6.29E+03        |
| GD3     | 1499.8712         | GD3 d38:1           | C72H129N3O29          | [M-2H] | 748.9283        | 748.9256         | -3.61            | 5.22      | 5.45E+04        |
| GD3     | 1527.9025         | GD3 d40:1           | C74H133N3O29          | [M-2H] | 762.9440        | 762.9379         | -8.00            | 5.14      | 6.20E+03        |
| GD3     | 1543.8399         | GD3 d42:7           | C76H125N3O29          | [M-2H] | 770.9121        | 770.9117         | -0.52            | 5.14      | 1.38E+04        |
| GD3     | 1573.8868         | GD3 d44:6           | C78H131N3O29          | [M-2H] | 785.9356        | 785.9395         | 4.96             | 5.10      | 9.28E+03        |
| GD3-Ac  | 1513.8504         | GD3-Ac d36 1        | C72H127N3O30          | [M-2H] | 755.9174        | 755.9128         | -6.09            | 3.51      | 9.46E+04        |
| GD3-Ac  | 1541.8817         | GD3-Ac d38 1        | C74H131N3O30          | [M-2H] | 769.9330        | 769.9307         | -2.99            | 3.40      | 1.03E+05        |
| GM1a    | 1517.8454         | GM1a d34:1          | C71H127N3O31          | [M-H]  | 1516.8381       | 1516.8370        | -0.73            | 5.27      | 1.88E+05        |
| GM1a    | 1531.8610         | GM1a d35:1          | C72H129N3O31          | [M-H]  | 1530.8537       | 1530.8536        | -0.07            | 5.21      | 3.24E+04        |
| GM1a    | 1542.8532         | GM1a d36:2          | C73H128N3O31          | [M-H]  | 1542.8537       | 1542.8540        | 0.19             | 5.19      | 6.89E+05        |
| GM1a    | 1545.8767         | GM1a d36:1          | C73H131N3O31          | [M-H]  | 1544.8694       | 1544.8699        | 0.32             | 5.19      | 3.88E+06        |

|          |           |                |               |        |           |           |       |         |          |
|----------|-----------|----------------|---------------|--------|-----------|-----------|-------|---------|----------|
| GM1a     | 1559.8923 | GM1a d37:1     | C74H133N3O31  | [M-H]  | 1558.8845 | 1558.8768 | -4.94 | 5.12    | 5.54E+04 |
| GM1a     | 1561.8716 | GM1a t36:1     | C73H131N3O32  | [M-H]  | 1560.8637 | 1560.8784 | 9.42  | 5.10    | 1.99E+04 |
| GM1a     | 1563.8872 | GM1a t36:0     | C73H133N3O32  | [M-H]  | 1562.8794 | 1562.8784 | -0.64 | 5.21    | 1.38E+04 |
| GM1a     | 1571.8923 | GM1a d38:2     | C75H133N3O31  | [M-H]  | 1570.8850 | 1570.8843 | -0.45 | 5.07    | 2.05E+05 |
| GM1a     | 1573.9080 | GM1a d38:1     | C75H135N3O31  | [M-H]  | 1572.9007 | 1572.8992 | -0.95 | 5.09    | 4.16E+05 |
| GM1a     | 1583.8559 | GM1a t38:4     | C75H129N3O32  | [M-H]  | 1582.8481 | 1582.8350 | -8.28 | 5.17    | 1.18E+04 |
| GM1a     | 1587.8872 | GM1a t38:2     | C75H133N3O32  | [M-H]  | 1586.8794 | 1586.8776 | -1.13 | 5.21    | 1.39E+04 |
| GM1a     | 1589.9029 | GM1a t38:1     | C75H135N3O32  | [M-H]  | 1588.8950 | 1588.8857 | -5.85 | 5.32    | 5.59E+04 |
| GM1a     | 1599.9236 | GM1a d40:2     | C77H137N3O31  | [M-H]  | 1598.9163 | 1598.9095 | -4.25 | 4.99    | 1.44E+04 |
| GM1a     | 1627.9549 | GM1a d42:2     | C79H141N3O31  | [M-H]  | 1626.9476 | 1626.9331 | -8.91 | 4.91    | 5.47E+04 |
| GM2      | 1355.7925 | GM2 d34:1      | C65H117N3O26  | [M-H]  | 1354.7853 | 1354.7958 | 7.75  | 3.91    | 1.56E+04 |
| GM2      | 1381.8082 | GM2 d36:2      | C67H119N3O26  | [M-H]  | 1380.8009 | 1380.7960 | -3.55 | 3.80    | 2.62E+04 |
| GM2      | 1383.8238 | GM2 d36:1      | C67H121N3O26  | [M-H]  | 1382.8166 | 1382.8152 | -1.01 | 3.83    | 1.48E+05 |
| GM2      | 1409.8395 | GM2 d38:2      | C69H122N3O26  | [M-H]  | 1408.8322 | 1408.8356 | 2.41  | 3.72    | 8.10E+03 |
| GM2      | 1411.8551 | GM2 d38:1      | C69H125N3O26  | [M-H]  | 1410.8479 | 1410.8452 | -1.91 | 3.72    | 2.95E+04 |
| GM2      | 1465.9021 | GM2 d42:2      | C73H131N3O26  | [M-H]  | 1464.8948 | 1464.8883 | -4.44 | 3.64    | 9.63E+03 |
| GM3      | 1152.7132 | GM3 d34:1      | C57H104N2O21  | [M-H]  | 1151.7059 | 1151.7040 | -1.65 | 2.28    | 2.27E+05 |
| GM3      | 1166.6924 | GM3 t34:2      | C57H102N2O22  | [M-H]  | 1165.6851 | 1165.6936 | 7.29  | 2.26    | 1.96E+04 |
| GM3      | 1168.7081 | GM3 t34:1      | C57H104N2O22  | [M-H]  | 1167.7008 | 1167.6949 | -5.05 | 2.21    | 9.63E+03 |
| GM3      | 1178.7288 | GM3 d36:2      | C59H106N2O21  | [M-H]  | 1177.7215 | 1177.7133 | -6.96 | 2.23    | 5.53E+04 |
| GM3      | 1180.7445 | GM3 d36:1      | C59H108N2O21  | [M-H]  | 1179.7372 | 1179.7378 | 0.51  | 2.23    | 2.12E+06 |
| GM3      | 1194.7237 | GM3 t36:2      | C59H106N2O22  | [M-H]  | 1193.7164 | 1193.7220 | 4.69  | 2.20    | 2.43E+04 |
| GM3      | 1198.6975 | GM3 d38:6      | C61H102N2O21  | [M-H]  | 1197.6902 | 1197.6790 | -9.35 | 2.09    | 4.10E+04 |
| GM3      | 1206.7601 | GM3 d38:2      | C61H110N2O21  | [M-H]  | 1205.7528 | 1205.7467 | -5.06 | 2.18    | 4.24E+04 |
| GM3      | 1208.7758 | GM3 d38:1      | C61H112N2O21  | [M-H]  | 1207.7685 | 1207.7666 | -1.57 | 2.20    | 1.42E+05 |
| GM3      | 1222.7550 | GM3 d39:1      | C61H110N2O22  | [M-H]  | 1221.7477 | 1221.7449 | -2.29 | 2.09    | 2.80E+04 |
| GM3      | 1224.7707 | GM3 t38:1      | C61H112N2O22  | [M-H]  | 1223.7634 | 1223.7599 | -2.86 | 2.09    | 1.25E+04 |
| GM3      | 1234.7914 | GM3 d40:2      | C63H114N2O21  | [M-H]  | 1233.7841 | 1233.7804 | -3.00 | 2.14    | 2.95E+04 |
| GM3      | 1236.8071 | GM3 d40:1      | C63H116N2O21  | [M-H]  | 1235.7998 | 1235.8000 | 0.16  | 2.14    | 3.42E+04 |
| GM3      | 1252.8020 | GM3 t40:1      | C63H116N2O22  | [M-H]  | 1251.7947 | 1251.7939 | -0.64 | 2.14    | 1.01E+04 |
| GM3      | 1260.8071 | GM3 d42:3      | C65H116N2O21  | [M-H]  | 1259.7998 | 1259.7882 | -9.21 | 2.13    | 1.23E+04 |
| GM3      | 1262.8227 | GM3 d42:2      | C65H118N2O21  | [M-H]  | 1261.8154 | 1261.8209 | 4.36  | 2.11    | 1.05E+05 |
| GM3      | 1276.8020 | GM3 t42:3      | C65H116N2O22  | [M-H]  | 1275.7947 | 1275.8051 | 8.15  | 2.14    | 6.81E+03 |
| GQ1b-Ac  | 2461.1735 | GQ1b-Ac d36:1  | C108H184N6O56 | [M-3H] | 819.3839  | 819.3812  | -3.30 | 9.54    | 3.16E+04 |
| GQ1b-Ac  | 2489.2048 | GQ1b-Ac d38:1  | C110H188N6O56 | [M-3H] | 828.7276  | 828.7278  | 0.24  | 9.47    | 2.72E+04 |
| GQ1b-Ac  | 2461.1735 | GQ1b-Ac t36:1  | C108H184N6O56 | [M-2H] | 1229.5879 | 1229.5822 | -4.64 | 9.49    | 2.13E+04 |
| GQ1b-Ac  | 2489.2048 | GQ1b-Ac t38:1  | C110H188N6O56 | [M-2H] | 1243.5946 | 1243.5934 | -0.96 | 9.34    | 1.45E+04 |
| GQ1b-Ac2 | 2503.1840 | GQ1b-Ac2 d36:1 | C110H186N6O57 | [M-3H] | 833.3869  | 833.3834  | -4.20 | 6.09    | 7.16E+04 |
| GQ1b-Ac2 | 2531.2153 | GQ1b-Ac2 d38:1 | C112H190N6O57 | [M-3H] | 842.7306  | 842.7281  | -2.97 | 6.01    | 1.01E+05 |
| GQ1b-Ac2 | 2503.1840 | GQ1b-Ac2 t36:1 | C110H186N6O57 | [M-2H] | 1250.5842 | 1250.5796 | -3.68 | 6.39    | 8.97E+04 |
| GQ1b-Ac2 | 2531.2153 | GQ1b-Ac2 t38:1 | C112H190N6O57 | [M-2H] | 1264.5998 | 1264.5961 | -2.93 | 6.23    | 5.99E+04 |
| GT1a     | 2126.0518 | GT1a d36:2     | C95H163N5O47  | [M-2H] | 1062.0187 | 1062.0197 | 0.94  | low int | low int  |
| GT1a     | 2128.0675 | GT1a d36:1     | C95H165N5O47  | [M-2H] | 1063.0265 | 1063.0245 | -1.88 | low int | low int  |

|          |           |                |               |        |           |           |       |         |          |
|----------|-----------|----------------|---------------|--------|-----------|-----------|-------|---------|----------|
| GT1a     | 2156.0988 | GT1a d38:1     | C97H169N5O47  | [M-2H] | 1077.0421 | 1077.0439 | 1.67  | 9.30    | 9.94E+03 |
| GT1a-Ac  | 2170.0781 | GT1a-Ac d36:1  | C97H167N5O48  | [M-3H] | 722.3521  | 722.3515  | -0.83 | 7.30    | 1.83E+04 |
| GT1a-Ac  | 2198.1094 | GT1a-Ac d38:1  | C99H171N5O48  | [M-3H] | 731.6958  | 731.6937  | -2.87 | 7.26    | 1.67E+04 |
| GT1a-Ac  | 2170.0781 | GT1a-Ac d36:1  | C97H167N5O48  | [M-2H] | 1084.0318 | 1084.0287 | -2.86 | 7.30    | 4.51E+04 |
| GT1a-Ac  | 2192.0624 | GT1a-Ac d36:4  | C99H165N5O48  | [M-2H] | 1095.0234 | 1095.0209 | -2.28 | 7.33    | 3.47E+03 |
| GT1a-Ac  | 2198.1094 | GT1a-Ac d38:1  | C99H171N5O48  | [M-2H] | 1098.0474 | 1098.0432 | -3.82 | 7.25    | 4.75E+04 |
| GT1a-Ac  | 2220.0937 | GT1a-Ac d40:4  | C101H169N5O48 | [M-2H] | 1109.0395 | 1109.0294 | -9.11 | 7.20    | 5.77E+03 |
| GT1a-Ac  | 2226.1407 | GT1a-Ac d40:1  | C101H175N5O48 | [M-2H] | 1112.0631 | 1112.0596 | -3.15 | low int | low int  |
| GT1b     | 2100.0362 | GT1b d34:1     | C93H161N5O47  | [M-2H] | 1049.0108 | 1049.0208 | 9.53  | 11.07   | 4.46E+03 |
| GT1b     | 2114.0518 | GT1b d35:1     | C94H163N5O47  | [M-2H] | 1056.0186 | 1056.0211 | 2.37  | 11.02   | 4.60E+03 |
| GT1b     | 2126.0518 | GT1b d36:2     | C95H163N5O47  | [M-2H] | 1062.0187 | 1062.0201 | 1.32  | 10.92   | 1.23E+04 |
| GT1b     | 2128.0675 | GT1b d36:1     | C95H165N5O47  | [M-2H] | 1063.0265 | 1063.0227 | -3.57 | 10.94   | 1.76E+05 |
| GT1b     | 2142.0831 | GT1b d37:1     | C96H167N5O47  | [M-2H] | 1070.0343 | 1070.0370 | 2.52  | 10.85   | 4.66E+03 |
| GT1b     | 2150.0518 | GT1b d38:4     | C97H163N5O47  | [M-2H] | 1074.0187 | 1074.0085 | -9.50 | 10.90   | 1.37E+04 |
| GT1b     | 2154.0831 | GT1b d38:2     | C97H167N5O47  | [M-2H] | 1076.0343 | 1076.0287 | -5.20 | 10.83   | 1.10E+04 |
| GT1b     | 2156.0988 | GT1b d38:1     | C97H169N5O47  | [M-2H] | 1077.0421 | 1077.0382 | -3.62 | 10.82   | 9.11E+04 |
| GT1b     | 2166.0468 | GT1b t38:4     | C97H163N5O48  | [M-2H] | 1082.0156 | 1082.0072 | -7.76 | 10.94   | 1.70E+04 |
| GT1b     | 2178.0831 | GT1b d40:4     | C99H167N5O47  | [M-2H] | 1088.0340 | 1088.0370 | 2.76  | 10.80   | 6.79E+03 |
| GT1b     | 2184.1301 | GT1b d40:1     | C99H173N5O47  | [M-2H] | 1091.0578 | 1091.0514 | -5.87 | 10.80   | 8.87E+03 |
| GT1b-Ac  | 2170.0781 | GT1b-Ac d36:1  | C97H167N5O48  | [M-3H] | 722.3521  | 722.3497  | -3.32 | 9.25    | 6.16E+04 |
| GT1b-Ac  | 2198.1094 | GT1b-Ac d38:1  | C99H171N5O48  | [M-3H] | 731.6958  | 731.6949  | -1.23 | 9.20    | 7.13E+04 |
| GT1b-Ac  | 2170.0781 | GT1b-Ac td36:1 | C97H167N5O48  | [M-2H] | 1084.0318 | 1084.0302 | -1.48 | 9.29    | 2.93E+05 |
| GT1b-Ac  | 2192.0624 | GT1b-Ac d36:4  | C99H165N5O48  | [M-2H] | 1095.0234 | 1095.0212 | -2.01 | 9.29    | 2.04E+04 |
| GT1b-Ac  | 2196.0937 | GT1b-Ac d38:2  | C99H169N5O48  | [M-2H] | 1097.0390 | 1097.0333 | -5.20 | 9.25    | 1.51E+04 |
| GT1b-Ac  | 2198.1094 | GT1b-Ac d38:1  | C99H171N5O48  | [M-2H] | 1098.0474 | 1098.0455 | -1.73 | 9.20    | 3.31E+05 |
| GT1b-Ac  | 2220.0937 | GT1b-Ac d40:4  | C101H169N5O48 | [M-2H] | 1109.0395 | 1109.0370 | -2.25 | 9.18    | 2.43E+04 |
| GT1b-Ac  | 2226.1407 | GT1b-Ac d40:1  | C101H175N5O48 | [M-2H] | 1112.0631 | 1112.0577 | -4.86 | 9.10    | 2.10E+04 |
| GT1b-Ac2 | 2212.0886 | GT1b-Ac2 d36:1 | C99H169N5O49  | [M-2H] | 1105.0365 | 1105.0367 | 0.18  | 7.89    | 2.91E+05 |
| GT1b-Ac2 | 2226.0679 | GT1b-Ac2 t36:2 | C99H167N5O50  | [M-2H] | 1112.0261 | 1112.0345 | 7.55  | 7.89    | 6.03E+03 |
| GT1b-Ac2 | 2234.0730 | GT1b-Ac2 d38:4 | C101H167N5O49 | [M-2H] | 1116.0287 | 1116.0311 | 2.15  | 7.90    | 1.28E+04 |
| GT1b-Ac2 | 2236.0886 | GT1b-Ac2 d38:3 | C101H169N5O49 | [M-2H] | 1117.0365 | 1117.0269 | -8.59 | 7.90    | 1.13E+04 |
| GT1b-Ac2 | 2240.1199 | GT1b-Ac2 d38:1 | C101H173N5O49 | [M-2H] | 1119.0521 | 1119.0498 | -2.06 | 7.82    | 5.01E+05 |
| GT1b-Ac2 | 2262.1043 | GT1b-Ac2 d40:4 | C103H171N5O49 | [M-2H] | 1130.0443 | 1130.0419 | -2.12 | 7.82    | 5.36E+04 |
| GT1b-Ac2 | 2268.1512 | GT1b-Ac2 d40:1 | C103H177N5O49 | [M-2H] | 1133.0678 | 1133.0703 | 2.21  | 7.72    | 3.26E+04 |
| GT3-Ac   | 1808.9408 | GT3-Ac t35:0   | C82H144N4O39  | [M-2H] | 903.4631  | 903.4644  | 1.44  | 6.50    | 1.71E+04 |
| GT3-Ac   | 1822.9564 | GT3-Ac t36:0   | C83H146N4O39  | [M-2H] | 910.4709  | 910.4628  | -8.90 | 6.50    | 9.90E+04 |
| GT3-Ac   | 1832.9772 | GT3-Ac d38:1   | C85H148N4O38  | [M-2H] | 915.4813  | 915.4797  | -1.75 | 6.50    | 8.07E+03 |
| ST       | 777.5061  | ST d34:2       | C40H75NO11S   | [M-H]  | 776.4988  | 776.4969  | -2.45 | 0.88    | 1.52E+04 |
| ST       | 779.5217  | ST d34:1       | C40H77NO11S   | [M-H]  | 778.5144  | 778.5129  | -1.93 | 0.88    | 1.34E+06 |
| ST       | 805.5374  | ST d36:2       | C42H79NO11S   | [M-H]  | 804.5301  | 804.5307  | 0.75  | 0.88    | 5.23E+05 |
| ST       | 807.5530  | ST d36:1       | C42H81NO11S   | [M-H]  | 806.5458  | 806.5486  | 3.47  | 0.88    | 8.82E+06 |
| ST       | 821.5323  | ST t36:2       | C42H79NO12S   | [M-H]  | 820.5250  | 820.5323  | 8.90  | 0.90    | 1.07E+05 |
| ST       | 823.5479  | ST t36:1       | C42H81NO12S   | [M-H]  | 822.5407  | 822.5460  | 6.44  | 0.87    | 1.08E+06 |

|    |           |               |              |       |           |           |       |      |          |
|----|-----------|---------------|--------------|-------|-----------|-----------|-------|------|----------|
| ST | 833.5687  | ST d38:2      | C44H83NO11S  | [M-H] | 832.5614  | 832.5583  | -3.72 | 0.88 | 2.35E+05 |
| ST | 835.5843  | ST d38:1      | C44H85NO11S  | [M-H] | 834.5770  | 834.5775  | 0.60  | 0.88 | 1.44E+06 |
| ST | 849.5636  | ST t38:2      | C44H83NO12S  | [M-H] | 848.5563  | 848.5593  | 3.54  | 0.87 | 9.82E+04 |
| ST | 851.5792  | ST t38:1      | C44H85NO12S  | [M-H] | 850.5720  | 850.5751  | 3.64  | 0.88 | 3.17E+05 |
| ST | 853.5949  | ST t38:0      | C44H87NO12S  | [M-H] | 852.5876  | 852.5822  | -6.33 | 0.88 | 9.42E+04 |
| ST | 859.5843  | ST d40:3      | C46H85NO11S  | [M-H] | 858.5770  | 858.5768  | -0.23 | 0.87 | 6.85E+04 |
| ST | 861.6000  | ST d40:2      | C46H87NO11S  | [M-H] | 860.5927  | 860.5952  | 2.90  | 0.87 | 1.80E+06 |
| ST | 863.6156  | ST d40:1      | C46H89NO11S  | [M-H] | 862.6083  | 862.6083  | 0.00  | 0.87 | 2.02E+06 |
| ST | 875.6156  | ST d41:2      | C47H89NO11S  | [M-H] | 874.6083  | 874.6072  | -1.26 | 0.87 | 4.30E+05 |
| ST | 879.6105  | ST t40:1      | C46H89NO12S  | [M-H] | 878.6033  | 878.6058  | 2.85  | 0.88 | 2.05E+06 |
| ST | 881.6262  | ST t40:0      | C46H91NO12S  | [M-H] | 880.6189  | 880.6111  | -8.86 | 0.88 | 4.25E+05 |
| ST | 887.6156  | ST d42:3      | C48H89NO11S  | [M-H] | 886.6083  | 886.6100  | 1.92  | 0.87 | 9.72E+05 |
| ST | 889.6313  | ST d42:2      | C48H91NO11S  | [M-H] | 888.6240  | 888.6270  | 3.38  | 0.87 | 2.24E+07 |
| ST | 891.6469  | ST d42:1      | C48H93NO11S  | [M-H] | 890.6396  | 890.6454  | 6.51  | 0.87 | 8.39E+06 |
| ST | 905.6262  | ST t42:2      | C48H91NO12S  | [M-H] | 904.6189  | 904.6228  | 4.31  | 0.88 | 9.56E+06 |
| ST | 907.6418  | ST t42:1      | C48H93NO12S  | [M-H] | 906.6346  | 906.6337  | -0.99 | 0.88 | 4.44E+06 |
| ST | 915.6469  | ST d44:3      | C50H93NO11S  | [M-H] | 914.6396  | 914.6310  | -9.40 | 0.87 | 3.45E+04 |
| ST | 917.6626  | ST d44:2      | C50H95NO11S  | [M-H] | 916.6553  | 916.6523  | -3.27 | 0.87 | 2.31E+05 |
| ST | 921.6575  | ST d43:1      | C49H95NO12S  | [M-H] | 920.6502  | 920.6466  | -3.91 | 0.88 | 1.41E+05 |
| ST | 931.6418  | ST t44:3      | C50H93NO12S  | [M-H] | 930.6346  | 930.6351  | 0.54  | 0.88 | 3.46E+04 |
| ST | 933.6575  | ST t44:2      | C50H95NO12S  | [M-H] | 932.6502  | 932.6474  | -3.00 | 0.88 | 1.18E+05 |
| ST | 935.6731  | ST t44:1      | C50H97NO12S  | [M-H] | 934.6659  | 934.6570  | -9.52 | 0.88 | 5.35E+04 |
| ST | 969.6059  | diHexST d36:1 | C48H91NO16S  | [M-H] | 968.5986  | 968.5978  | -0.83 | 0.92 | 1.74E+05 |
| ST | 997.6372  | diHexST d38:1 | C50H95NO16S  | [M-H] | 996.6299  | 996.6240  | -5.92 | 0.92 | 7.47E+04 |
| ST | 1023.6528 | diHexST d40:2 | C52H97NO16S  | [M-H] | 1022.6455 | 1022.6404 | -4.99 | 0.90 | 7.14E+04 |
| ST | 1025.6685 | diHexST d40:1 | C52H99NO16S  | [M-H] | 1024.6612 | 1024.6565 | -4.59 | 0.92 | 9.78E+04 |
| ST | 1039.6841 | diHexST d41:1 | C53H101NO16S | [M-H] | 1038.6768 | 1038.6763 | -0.48 | 0.92 | 4.12E+04 |
| ST | 1049.6685 | diHexST d42:3 | C54H99NO16S  | [M-H] | 1048.6612 | 1048.6550 | -5.91 | 0.90 | 2.67E+04 |
| ST | 1051.6841 | diHexST d42:2 | C54H101NO16S | [M-H] | 1050.6768 | 1050.6774 | 0.57  | 0.90 | 7.92E+05 |
| ST | 1053.6998 | diHexST d42:1 | C54H103NO16S | [M-H] | 1052.6925 | 1052.6858 | -6.36 | 0.92 | 3.41E+05 |

**Table S2.** Statistical analysis of data from GSL screening in aging rats and transgenic rat model for tau pathology. Data are shown as negative log (p-value of t-test).

|              |               | Aging CN groups |             |              |              |              |  | Aging TG groups |             |              |              |              |  | TG vs. Controls |             |             |               |               |               |
|--------------|---------------|-----------------|-------------|--------------|--------------|--------------|--|-----------------|-------------|--------------|--------------|--------------|--|-----------------|-------------|-------------|---------------|---------------|---------------|
| Lipid class  | Lipid species | CN 4 / CN 6     | CN 4 / CN 8 | CN 4 / CN 10 | CN 4 / CN 12 | CN 4 / CN 14 |  | TG 4 / TG 6     | TG 4 / TG 8 | TG 4 / TG 10 | TG 4 / TG 12 | TG 4 / TG 14 |  | TG 4 / CN 4     | TG 6 / CN 6 | TG 8 / CN 8 | TG 10 / CN 10 | TG 12 / CN 12 | TG 14 / CN 14 |
| GANGLIOSIDES | GD0a 36:2     | 0.14            | 0.08        | 0.30         | 0.00         | 0.35         |  | 0.61            | 0.07        | 0.29         | 0.44         | 0.05         |  | 0.28            | 0.32        | 0.31        | 0.37          | 0.00          | 1.00          |
|              | GD0a 38:1     | 0.44            | 0.18        | 0.17         | 0.00         | 0.32         |  | 1.05            | 0.22        | 0.19         | 0.19         | 0.15         |  | 0.48            | 1.01        | 0.09        | 0.53          | 0.44          | 1.11          |
|              | GD1a d37:1    | 0.48            | 0.28        | 0.14         | 0.24         | 0.08         |  | 0.84            | 0.28        | 0.28         | 0.31         | 0.18         |  | 0.37            | 1.07        | 0.15        | 0.26          | 0.13          | 0.35          |
|              | GD1a d38:1    | 0.80            | 0.63        | 0.02         | 0.40         | 0.06         |  | 0.60            | 0.13        | 0.29         | 0.43         | 0.23         |  | 0.46            | 1.06        | 0.34        | 0.60          | 0.27          | 0.81          |
|              | GD1a d38:2    | 0.45            | 0.39        | 0.03         | 0.39         | 0.02         |  | 0.34            | 0.12        | 0.18         | 0.24         | 0.54         |  | 0.24            | 0.76        | 0.03        | 0.43          | 0.05          | 0.75          |
|              | GD1a d40:1    | 0.53            | 0.23        | 0.14         | 0.15         | 0.03         |  | 0.93            | 0.43        | 0.00         | 0.35         | 0.44         |  | 0.43            | 1.13        | 0.15        | 0.55          | 0.03          | 0.06          |
|              | GD1a-Ac d36:1 | 0.59            | 0.48        | 0.11         | 0.57         | 0.08         |  | 0.49            | 0.04        | 0.13         | 0.22         | 0.42         |  | 0.29            | 0.97        | 0.13        | 0.54          | 0.04          | 0.73          |
|              | GD1a-Ac d38:1 | 0.74            | 0.57        | 0.07         | 0.55         | 0.27         |  | 0.44            | 0.08        | 0.43         | 0.66         | 0.43         |  | 0.34            | 1.06        | 0.15        | 0.85          | 0.21          | 0.46          |
|              | GD1b 38:1     | 0.72            | 0.45        | 0.12         | 0.28         | 0.15         |  | 0.54            | 0.06        | 0.50         | 0.33         | 0.02         |  | 0.41            | 1.00        | 0.14        | 0.78          | 0.32          | 0.31          |
|              | GD1b-Ac d36:1 | 0.90            | 0.51        | 0.11         | 0.75         | 0.84         |  | 0.48            | 0.16        | 0.53         | 0.41         | 0.39         |  | 0.45            | 1.03        | 0.05        | 0.77          | 0.00          | 0.04          |
|              | GD1b-Ac d38:1 | 0.93            | 0.60        | 0.08         | 0.54         | 0.79         |  | 0.46            | 0.08        | 0.59         | 0.74         | 0.31         |  | 0.43            | 1.12        | 0.12        | 0.83          | 0.28          | 0.02          |
|              | GD2 d36:1     | 1.12            | 0.75        | 0.21         | 0.82         | 0.43         |  | 0.30            | 0.24        | 0.47         | 0.90         | 0.70         |  | 0.64            | 0.96        | 0.06        | 0.74          | 0.38          | 0.67          |
|              | GD3 d34:1     | 0.94            | 0.49        | 0.20         | 0.63         | 0.81         |  | 0.13            | 0.00        | 0.06         | 0.01         | 0.18         |  | 0.20            | 1.41        | 0.28        | 0.07          | 0.42          | 0.40          |
|              | GD3 d36:1     | 1.14            | 0.64        | 0.15         | 0.97         | 0.74         |  | 0.13            | 0.22        | 0.80         | 0.80         | 0.50         |  | 0.19            | 1.44        | 0.18        | 0.79          | 0.15          | 0.07          |
|              | GD3 d36:2     | 0.41            | 0.15        | 0.03         | 0.25         | 0.05         |  | 0.16            | 0.08        | 0.28         | 0.09         | 0.06         |  | 0.11            | 0.71        | 0.04        | 0.48          | 0.06          | 0.12          |
|              | GD3 d40:1     | 0.49            | 0.11        | 0.02         | 0.29         | 0.33         |  | 0.43            | 0.05        | 0.49         | 0.06         | 0.14         |  | 0.23            | 1.07        | 0.07        | 0.82          | 0.13          | 0.27          |
|              | GD3 d44:6     | 0.05            | 0.29        | 0.78         | 0.86         | 0.94         |  | 0.93            | 0.91        | 0.13         | 1.38         | 1.81         |  | 0.21            | 0.52        | 0.14        | 0.99          | 0.49          | 0.21          |
|              | GD3-Ac d36:1  | 0.51            | 0.17        | 0.15         | 0.63         | 1.05         |  | 0.54            | 0.16        | 0.31         | 0.02         | 0.01         |  | 0.68            | 0.42        | 0.45        | 0.50          | 0.09          | 0.42          |
|              | GD3-Ac d38:1  | 0.55            | 0.17        | 0.08         | 0.71         | 1.21         |  | 0.53            | 0.10        | 0.49         | 0.07         | 0.09         |  | 0.63            | 0.48        | 0.34        | 0.76          | 0.13          | 0.71          |
|              | GM1a d34:1    | 0.38            | 0.03        | 0.58         | 0.21         | 0.22         |  | 1.36            | 0.86        | 0.09         | 0.64         | 0.63         |  | 0.32            | 1.28        | 0.12        | 0.99          | 0.21          | 0.17          |
|              | GM1a d35:1    | 0.32            | 0.10        | 0.78         | 0.53         | 0.55         |  | 1.43            | 1.53        | 0.51         | 1.51         | 1.64         |  | 0.31            | 1.31        | 0.29        | 0.78          | 0.16          | 0.01          |
|              | GM1a d36:2    | 0.45            | 0.05        | 0.27         | 0.06         | 0.18         |  | 0.38            | 0.14        | 0.14         | 0.31         | 0.08         |  | 0.28            | 0.72        | 0.10        | 0.92          | 0.13          | 0.63          |
|              | GM1a d37:1    | 0.35            | 0.12        | 0.79         | 0.73         | 0.77         |  | 1.21            | 1.52        | 0.33         | 1.84         | 1.78         |  | 0.43            | 1.06        | 0.15        | 1.12          | 0.40          | 0.19          |
|              | GM1a d38:1    | 0.25            | 0.14        | 0.82         | 0.95         | 0.98         |  | 1.18            | 1.54        | 0.05         | 1.43         | 1.67         |  | 0.42            | 0.74        | 0.08        | 1.14          | 0.76          | 0.43          |



|               |      |      |      |      |      |  |      |      |      |      |      |  |      |      |      |      |      |      |
|---------------|------|------|------|------|------|--|------|------|------|------|------|--|------|------|------|------|------|------|
| GM1a d40:2    | 0.03 | 0.74 | 1.79 | 1.87 | 1.10 |  | 2.03 | 1.56 | 1.30 | 3.06 | 2.71 |  | 0.24 | 1.21 | 0.22 | 1.12 | 0.53 | 0.10 |
| GM1a d42:2    | 0.17 | 1.16 | 3.07 | 3.31 | 2.01 |  | 3.42 | 4.19 | 1.94 | 5.63 | 6.46 |  | 0.41 | 1.13 | 0.01 | 1.02 | 0.65 | 0.06 |
| GM1a t38:1    | 0.33 | 0.04 | 0.12 | 0.14 | 0.46 |  | 0.25 | 0.12 | 0.39 | 0.08 | 0.42 |  | 0.23 | 0.43 | 0.38 | 0.92 | 0.20 | 0.08 |
| GM1a t38:2    | 0.44 | 0.04 | 0.49 | 0.35 | 0.45 |  | 1.07 | 0.64 | 0.07 | 0.86 | 0.80 |  | 0.38 | 1.31 | 0.05 | 1.13 | 0.49 | 0.41 |
| GM1a t38:4    | 0.30 | 0.07 | 0.56 | 0.56 | 0.67 |  | 1.27 | 1.46 | 0.46 | 1.55 | 1.62 |  | 0.44 | 0.92 | 0.10 | 0.94 | 0.49 | 0.37 |
| GM2 36:2      | 0.46 | 0.08 | 0.19 | 0.14 | 0.09 |  | 0.45 | 0.28 | 0.27 | 0.53 | 0.30 |  | 0.43 | 0.54 | 0.13 | 0.58 | 0.28 | 0.49 |
| GM2 d34:1     | 0.22 | 0.04 | 0.51 | 0.33 | 0.18 |  | 1.33 | 0.87 | 0.59 | 1.40 | 1.29 |  | 0.37 | 1.16 | 0.04 | 0.49 | 0.01 | 0.16 |
| GM2 d38:1     | 0.38 | 0.01 | 0.43 | 0.50 | 0.46 |  | 0.85 | 1.22 | 0.27 | 1.44 | 1.57 |  | 0.48 | 0.66 | 0.12 | 0.78 | 0.46 | 0.18 |
| GM3 d34:1     | 0.91 | 0.75 | 0.02 | 0.46 | 0.62 |  | 0.67 | 0.41 | 0.18 | 1.29 | 0.52 |  | 0.29 | 1.94 | 1.03 | 0.01 | 1.52 | 1.04 |
| GM3 d36:1     | 0.95 | 0.56 | 0.03 | 0.47 | 0.44 |  | 0.31 | 0.25 | 0.32 | 0.01 | 0.10 |  | 0.13 | 1.63 | 0.84 | 0.41 | 0.40 | 0.49 |
| GM3 d38:2     | 0.45 | 0.32 | 0.05 | 0.44 | 0.38 |  | 0.07 | 0.18 | 0.01 | 1.30 | 0.03 |  | 0.18 | 0.43 | 0.34 | 0.16 | 1.66 | 0.27 |
| GM3 d40:1     | 0.48 | 0.31 | 0.09 | 0.12 | 0.08 |  | 0.66 | 1.29 | 0.35 | 2.56 | 1.37 |  | 0.39 | 0.69 | 0.96 | 0.01 | 1.75 | 0.58 |
| GM3 d42:2     | 0.52 | 0.31 | 0.25 | 0.00 | 0.16 |  | 1.39 | 2.04 | 0.79 | 3.35 | 2.19 |  | 0.22 | 2.16 | 2.02 | 0.28 | 3.19 | 1.83 |
| GM3 d42:3     | 0.22 | 0.00 | 0.04 | 0.26 | 0.18 |  | 0.76 | 0.46 | 0.56 | 1.83 | 0.26 |  | 0.26 | 0.63 | 0.07 | 0.19 | 1.69 | 0.13 |
| GM3 t38:1     | 0.33 | 0.03 | 0.07 | 0.01 | 0.04 |  | 0.48 | 0.18 | 0.49 | 1.69 | 0.82 |  | 0.28 | 0.53 | 0.20 | 0.07 | 0.68 | 0.35 |
| GM3 t40:1     | 0.15 | 0.00 | 0.29 | 0.11 | 0.03 |  | 0.75 | 1.42 | 0.55 | 2.22 | 1.59 |  | 0.21 | 0.57 | 0.67 | 0.06 | 1.29 | 1.06 |
| GM3 t42:3     | 0.21 | 0.15 | 0.41 | 0.19 | 0.18 |  | 1.40 | 1.69 | 1.81 | 4.44 | 3.27 |  | 0.45 | 0.81 | 0.15 | 0.19 | 1.56 | 1.01 |
| GT1a-Ac 36:1  | 0.55 | 0.20 | 0.06 | 0.61 | 0.10 |  | 0.39 | 0.29 | 0.56 | 0.36 | 0.55 |  | 0.17 | 1.22 | 0.27 | 0.84 | 0.09 | 0.59 |
| GT1a-Ac 38:1  | 0.11 | 0.14 | 0.20 | 0.10 | 0.05 |  | 0.01 | 0.48 | 0.42 | 0.07 | 0.21 |  | 0.04 | 0.11 | 0.76 | 0.66 | 0.03 | 0.02 |
| GT1a-Ac d36:1 | 0.63 | 0.37 | 0.01 | 0.71 | 0.23 |  | 0.20 | 0.28 | 0.53 | 0.48 | 0.56 |  | 0.21 | 0.86 | 0.10 | 0.75 | 0.04 | 0.39 |
| GT1a-Ac d38:1 | 0.76 | 0.48 | 0.00 | 0.66 | 0.70 |  | 0.07 | 0.28 | 0.85 | 0.81 | 0.54 |  | 0.26 | 0.73 | 0.06 | 1.12 | 0.20 | 0.12 |
| GT1b 35:1     | 0.82 | 0.44 | 0.59 | 0.94 | 0.25 |  | 0.17 | 0.44 | 0.05 | 0.54 | 0.47 |  | 0.31 | 0.81 | 0.19 | 0.12 | 0.12 | 0.25 |
| GT1b 37:1     | 0.61 | 0.28 | 0.15 | 0.37 | 0.15 |  | 0.87 | 0.01 | 0.15 | 0.14 | 0.19 |  | 0.38 | 1.39 | 0.08 | 0.03 | 0.16 | 0.02 |
| GT1b 38:1     | 1.14 | 0.85 | 0.47 | 0.79 | 0.64 |  | 0.50 | 0.37 | 0.40 | 0.65 | 0.52 |  | 0.61 | 1.20 | 0.01 | 0.45 | 0.11 | 0.39 |
| GT1b 38:2     | 0.83 | 0.68 | 0.51 | 1.19 | 0.66 |  | 0.50 | 0.70 | 0.28 | 0.44 | 0.61 |  | 0.46 | 1.07 | 0.38 | 0.22 | 0.23 | 0.19 |
| GT1b 40:1     | 0.78 | 0.34 | 0.30 | 0.44 | 0.31 |  | 0.71 | 0.24 | 0.13 | 0.00 | 0.01 |  | 0.57 | 1.13 | 0.31 | 0.28 | 0.05 | 0.23 |
| GT1b 40:4     | 0.97 | 0.62 | 0.40 | 0.61 | 0.59 |  | 0.47 | 0.34 | 0.12 | 0.33 | 0.38 |  | 0.62 | 1.08 | 0.24 | 0.26 | 0.18 | 0.38 |
| GT1b-Ac 36:1  | 0.91 | 0.62 | 0.21 | 1.03 | 0.60 |  | 0.46 | 0.39 | 0.35 | 0.49 | 0.50 |  | 0.39 | 1.14 | 0.09 | 0.43 | 0.19 | 0.17 |
| GT1b-Ac 38:1  | 0.98 | 0.77 | 0.25 | 0.94 | 1.24 |  | 0.39 | 0.42 | 0.37 | 0.74 | 0.58 |  | 0.51 | 1.07 | 0.08 | 0.53 | 0.08 | 0.03 |
| GT1b-Ac d38:1 | 1.12 | 0.83 | 0.26 | 0.99 | 1.33 |  | 0.36 | 0.37 | 0.45 | 0.87 | 0.64 |  | 0.52 | 1.07 | 0.03 | 0.56 | 0.05 | 0.03 |
| GT1b-Ac d38:2 | 0.69 | 0.45 | 0.20 | 0.76 | 0.87 |  | 0.34 | 0.46 | 0.39 | 0.29 | 0.47 |  | 0.33 | 0.93 | 0.29 | 0.47 | 0.11 | 0.04 |

|            |                |      |      |      |      |      |  |      |      |      |      |      |  |      |      |      |      |      |      |
|------------|----------------|------|------|------|------|------|--|------|------|------|------|------|--|------|------|------|------|------|------|
|            | GT1b-Ac d40:1  | 0.88 | 0.54 | 0.12 | 0.58 | 0.77 |  | 0.67 | 0.13 | 0.25 | 0.23 | 0.11 |  | 0.57 | 1.13 | 0.07 | 0.61 | 0.06 | 0.02 |
|            | GT1b-Ac d40:4  | 0.92 | 0.81 | 0.32 | 0.85 | 1.20 |  | 0.33 | 0.48 | 0.42 | 0.82 | 0.72 |  | 0.49 | 0.94 | 0.05 | 0.52 | 0.11 | 0.02 |
|            | GT1b-Ac2 d36:1 | 0.63 | 0.37 | 0.03 | 0.76 | 0.94 |  | 0.32 | 0.20 | 0.34 | 0.35 | 0.48 |  | 0.40 | 0.57 | 0.23 | 0.66 | 0.01 | 0.08 |
|            | GT1b-Ac2 d38:1 | 0.88 | 0.70 | 0.10 | 0.96 | 1.47 |  | 0.28 | 0.31 | 0.53 | 0.83 | 0.72 |  | 0.38 | 0.84 | 0.00 | 0.69 | 0.04 | 0.27 |
|            | GT1b-Ac2 d38:3 | 0.58 | 0.45 | 0.18 | 0.63 | 0.94 |  | 0.25 | 0.30 | 0.36 | 0.27 | 0.59 |  | 0.47 | 0.39 | 0.33 | 0.65 | 0.07 | 0.10 |
|            | GT1b-Ac2 d40:1 | 0.81 | 0.56 | 0.02 | 0.68 | 1.31 |  | 0.39 | 0.15 | 0.40 | 0.55 | 0.33 |  | 0.46 | 0.83 | 0.04 | 0.85 | 0.16 | 0.32 |
|            | GT1b-Ac2 d40:4 | 0.80 | 0.84 | 0.27 | 0.87 | 1.46 |  | 0.19 | 0.36 | 0.56 | 0.75 | 0.96 |  | 0.46 | 0.60 | 0.02 | 0.67 | 0.08 | 0.17 |
|            | GT3-Ac 38:1    | 0.51 | 0.11 | 0.01 | 0.32 | 0.27 |  | 0.46 | 0.38 | 0.30 | 0.01 | 0.03 |  | 0.49 | 0.56 | 0.29 | 0.53 | 0.46 | 0.46 |
| SULFATIDES | diHexST d36:1  | 1.32 | 1.21 | 1.50 | 2.29 | 2.98 |  | 0.14 | 1.13 | 0.87 | 1.03 | 2.53 |  | 0.39 | 0.91 | 0.08 | 0.00 | 0.94 | 0.69 |
|            | diHexST d38:1  | 0.85 | 0.58 | 0.98 | 1.55 | 2.28 |  | 0.23 | 0.25 | 0.26 | 0.70 | 1.95 |  | 0.67 | 0.43 | 0.27 | 0.03 | 0.17 | 0.21 |
|            | diHexST d40:1  | 0.74 | 0.52 | 0.91 | 1.33 | 1.89 |  | 0.42 | 0.30 | 0.32 | 0.73 | 1.62 |  | 0.60 | 0.59 | 0.36 | 0.12 | 0.00 | 0.02 |
|            | diHexST d40:2  | 0.45 | 0.28 | 1.00 | 1.31 | 2.64 |  | 0.36 | 0.90 | 1.13 | 0.92 | 2.96 |  | 0.53 | 0.28 | 0.98 | 0.46 | 0.01 | 0.19 |
|            | diHexST d42:1  | 0.68 | 0.38 | 0.92 | 1.08 | 1.91 |  | 0.37 | 0.15 | 0.36 | 0.07 | 1.33 |  | 0.56 | 0.50 | 0.30 | 0.15 | 0.38 | 0.17 |
|            | diHexST d42:3  | 0.69 | 0.35 | 1.54 | 1.68 | 2.68 |  | 0.06 | 2.38 | 1.01 | 1.48 | 4.30 |  | 0.33 | 0.41 | 1.63 | 0.27 | 0.40 | 0.01 |
|            | ST d34:1       | 1.18 | 1.25 | 1.10 | 1.84 | 2.48 |  | 0.34 | 1.50 | 1.29 | 1.90 | 3.11 |  | 0.27 | 0.67 | 0.21 | 0.27 | 0.14 | 0.32 |
|            | ST d34:2       | 0.41 | 0.06 | 0.45 | 0.91 | 0.96 |  | 0.22 | 0.65 | 0.32 | 0.08 | 0.62 |  | 0.15 | 0.04 | 1.22 | 0.05 | 0.92 | 0.19 |
|            | ST d36:1       | 1.19 | 1.39 | 1.08 | 1.94 | 2.17 |  | 0.36 | 1.14 | 1.24 | 1.65 | 2.69 |  | 0.34 | 0.47 | 0.09 | 0.37 | 0.21 | 0.46 |
|            | ST d36:2       | 0.99 | 0.63 | 0.88 | 1.43 | 1.75 |  | 0.46 | 1.33 | 1.42 | 0.95 | 1.96 |  | 0.15 | 0.45 | 0.49 | 0.33 | 0.43 | 0.46 |
|            | ST d38:1       | 0.39 | 0.21 | 0.06 | 0.37 | 0.92 |  | 0.43 | 0.03 | 0.08 | 0.08 | 0.39 |  | 0.60 | 0.16 | 0.37 | 0.47 | 0.10 | 0.28 |
|            | ST d38:2       | 0.30 | 0.04 | 0.01 | 0.19 | 0.73 |  | 0.22 | 0.17 | 0.23 | 0.10 | 0.58 |  | 0.38 | 0.12 | 0.77 | 0.54 | 0.07 | 0.17 |
|            | ST d40:1       | 0.58 | 0.53 | 0.46 | 1.01 | 1.42 |  | 0.23 | 0.46 | 0.32 | 0.30 | 1.47 |  | 0.63 | 0.18 | 0.57 | 0.33 | 0.05 | 0.08 |
|            | ST d40:2       | 0.23 | 0.05 | 0.01 | 0.13 | 0.78 |  | 0.47 | 0.10 | 0.26 | 0.18 | 0.71 |  | 0.56 | 0.05 | 0.75 | 0.79 | 0.28 | 0.14 |
|            | ST d41:2       | 0.03 | 1.02 | 1.08 | 1.20 | 0.66 |  | 0.85 | 1.17 | 1.12 | 3.96 | 3.63 |  | 0.39 | 0.10 | 0.77 | 0.47 | 0.40 | 0.29 |
|            | ST d42:1       | 0.76 | 1.11 | 2.27 | 2.73 | 2.80 |  | 0.02 | 0.84 | 0.17 | 1.29 | 1.99 |  | 0.72 | 0.10 | 0.34 | 0.51 | 0.23 | 0.27 |
|            | ST d42:2       | 0.18 | 0.14 | 0.15 | 0.01 | 0.45 |  | 0.20 | 0.05 | 0.05 | 1.03 | 0.03 |  | 0.31 | 0.06 | 0.78 | 0.54 | 0.38 | 0.26 |
|            | ST d42:3       | 0.33 | 0.02 | 0.37 | 0.83 | 1.18 |  | 0.08 | 0.75 | 0.90 | 0.15 | 1.41 |  | 0.20 | 0.05 | 1.21 | 0.47 | 0.37 | 0.01 |
|            | ST d43:1       | 0.06 | 1.02 | 1.20 | 1.30 | 2.02 |  | 1.26 | 1.37 | 1.66 | 3.56 | 4.38 |  | 0.40 | 0.32 | 0.56 | 0.06 | 0.42 | 0.14 |
|            | ST d44:2       | 0.02 | 0.03 | 0.00 | 0.49 | 0.93 |  | 0.40 | 0.44 | 0.25 | 0.06 | 0.62 |  | 0.13 | 0.22 | 0.86 | 0.09 | 0.43 | 0.05 |
|            | ST t36:1       | 0.96 | 1.57 | 2.13 | 3.02 | 3.47 |  | 1.31 | 2.94 | 2.58 | 3.93 | 5.39 |  | 0.15 | 0.01 | 0.60 | 0.17 | 0.42 | 0.02 |
|            | ST t38:0       | 0.48 | 0.17 | 0.63 | 1.24 | 0.91 |  | 0.35 | 0.64 | 0.81 | 0.60 | 1.45 |  | 0.39 | 0.16 | 0.75 | 0.35 | 0.20 | 0.49 |
|            | ST t40:1       | 0.24 | 0.05 | 0.01 | 0.09 | 0.21 |  | 0.94 | 0.28 | 0.23 | 0.47 | 0.46 |  | 0.57 | 0.35 | 0.23 | 0.20 | 0.11 | 0.00 |

|          |      |      |      |      |      |  |      |      |      |      |      |  |      |      |      |      |      |      |
|----------|------|------|------|------|------|--|------|------|------|------|------|--|------|------|------|------|------|------|
| ST t42:1 | 0.25 | 0.20 | 0.10 | 0.22 | 0.07 |  | 0.75 | 0.12 | 0.39 | 0.14 | 0.27 |  | 0.51 | 0.33 | 0.07 | 0.03 | 0.09 | 0.25 |
| ST t42:2 | 0.20 | 1.42 | 1.33 | 1.67 | 1.14 |  | 1.56 | 2.15 | 0.81 | 4.72 | 3.92 |  | 0.47 | 0.26 | 0.55 | 0.53 | 0.28 | 0.21 |
| ST t44:2 | 0.06 | 0.30 | 0.12 | 0.14 | 0.13 |  | 0.80 | 0.03 | 0.59 | 0.69 | 0.17 |  | 0.37 | 0.32 | 1.31 | 0.01 | 0.33 | 0.15 |

**Table S3.** Results from reproducibility testing.

| Analyte    | Average Peak Area (n=12) | RSD (%) |
|------------|--------------------------|---------|
| GD1a d36:1 | 1.6E+08                  | 15      |
| GD1b 36:1  | 3.5E+07                  | 18      |
| GM1a d36:1 | 7.1E+06                  | 3       |
| GM3 d36:1  | 8.2E+06                  | 15      |
| ST 36:1    | 1.1E+08                  | 10      |

**References:**

1. Hájek, R.; Jirásko, R.; Lída, M.; Cífková, E.; Holčápek, M.; Haek, R.; Jirako, R.; Lída, M.; Cífkova, E.; Holč, M.; et al. Hydrophilic Interaction Liquid Chromatography-Mass Spectrometry Characterization of Gangliosides in Biological Samples. *Analytical Chemistry* **2017**, *89*, 12425–12432, doi:10.1021/acs.analchem.7b03523.
